# Supplementary material for: Descriptive Anatomy and Three-Dimensional Reconstruction of the Skull of the Early Tetrapod Acanthostega gunnari Jarvik, 1952
Source: PubMed Central journal article supplement (PMC4356540; doi:10.1371/journal.pone.0118882), 2015-03-11

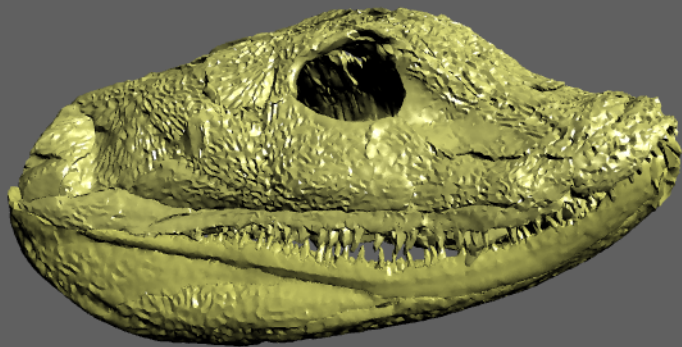

Supplement: pone.0118882.s002.pdf [file pone.0118882.s002.pdf]
